# Supplementary material for: Nucleation and Growth-Controlled Facile Fabrication of Gold Nanoporous Structures for Highly Sensitive Surface-Enhanced Raman Spectroscopy Applications
Source: MDPI journal article supplement (doi:10.3390/nano11061463), 2021-06-01
Supplement: s1 [file s1]

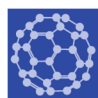

Article

# Nucleation and Growth-Controlled Facile Fabrication of Gold Nanoporous Structures for Highly Sensitive Surface-Enhanced Raman Spectroscopy Applications

Eunji Lee and Sangwoo Ryu \*

Department of Advanced Materials Engineering, Kyonggi University, Suwon 16227, Korea; eg29560@kyonggi.ac.kr

\* Correspondence: sryu@kyonggi.ac.kr; Tel.: +82-31-249-9761

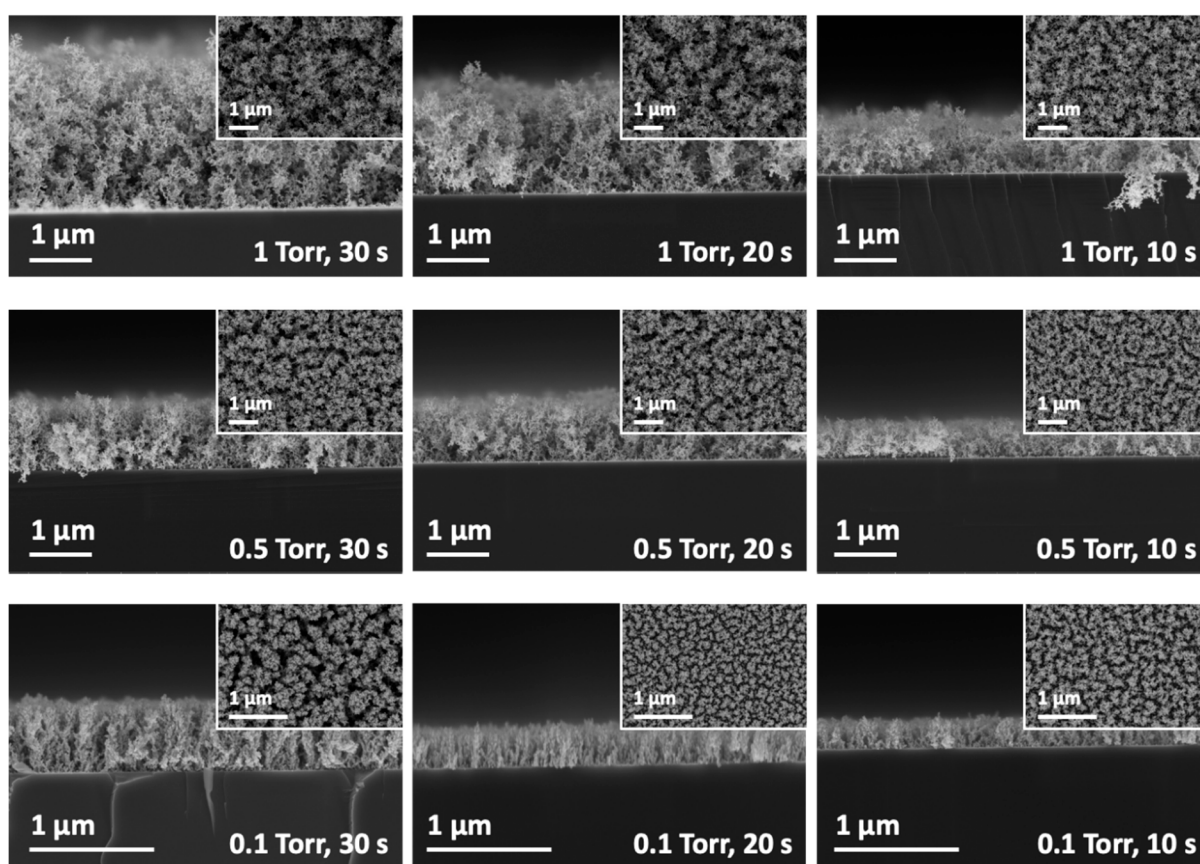

**Figure S1.** Various morphologies of porous Au synthesized by high-pressure thermal evaporation with different deposition pressure and time.

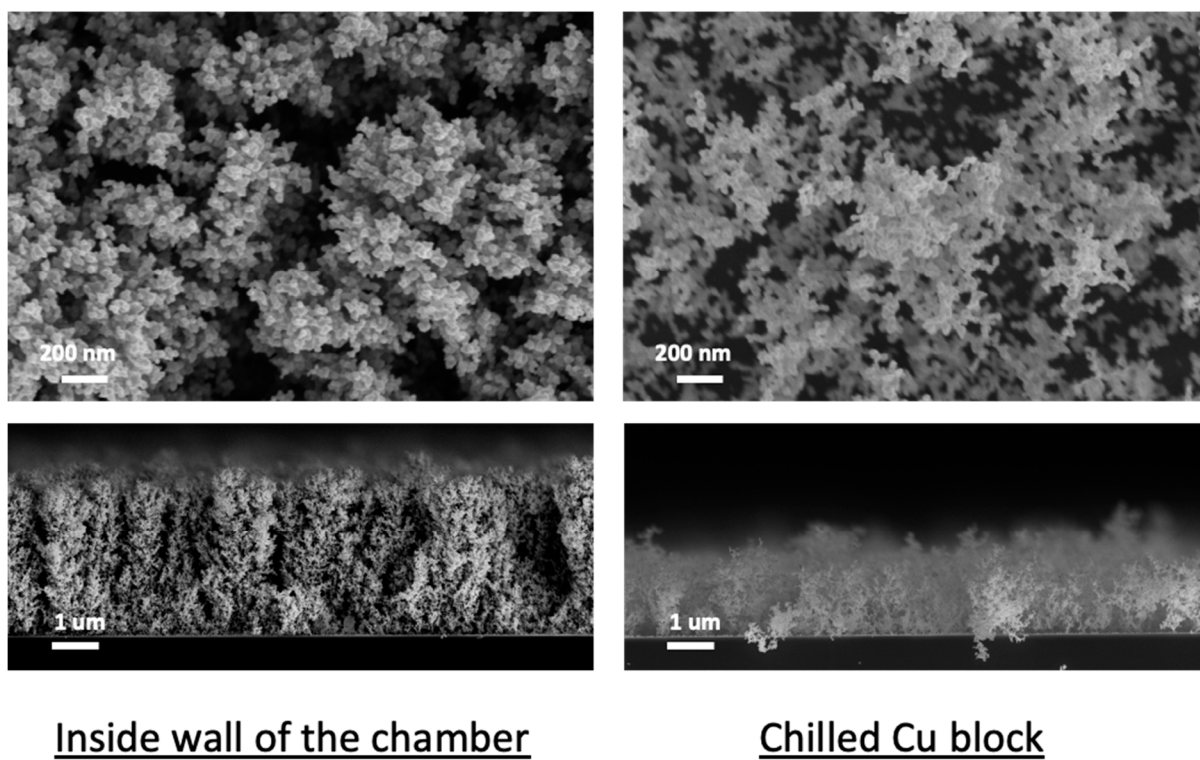

**Figure S2.** Different morphology of the porous Au nanostructures synthesized by high-pressure thermal evaporation depending on deposition temperature.
